# Supplementary material
Source: publisher site journal article supplement (https://kjim.org/upload/media/kjim-2023-303-Supplementary-Table-2.pdf)
Supplement: Supplementary file 1 [file kjim-2023-303-Supplementary-Table-2.pdf]

**Supplementary Table 2. Baseline characteristics of metformin users and non-users before propensity score matching in women**

| Variable                   | Women                       |                                 | p value |
|----------------------------|-----------------------------|---------------------------------|---------|
|                            | Metformin users (n = 8,040) | Metformin non-users (n = 2,192) |         |
| Age group (yr)             |                             |                                 | < 0.01  |
| 18–24                      | 10 (0.1)                    | 2 (0.1)                         |         |
| 25–34                      | 62 (0.8)                    | 20 (0.9)                        |         |
| 35–44                      | 243 (3.0)                   | 53 (2.4)                        |         |
| 45–54                      | 673 (8.4)                   | 115 (5.3)                       |         |
| 55–64                      | 1,162 (14.5)                | 215 (9.8)                       |         |
| 65–74                      | 2,300 (28.6)                | 541 (24.7)                      |         |
| > 75                       | 3,590 (44.7)                | 1,246 (56.8)                    |         |
| Age (yr)                   | 73 (63–79)                  | 76 (69–81)                      | < 0.01  |
| Region, metropolitan       | 3,179 (39.5)                | 886 (40.4)                      | 0.456   |
| Nationality, Korean        | 7,983 (99.3)                | 2,183 (99.6)                    | 0.122   |
| Household income           |                             |                                 | 0.274   |
| 0 (lowest)                 | 906 (11.3)                  | 284 (13.0)                      |         |
| 1                          | 1,297 (16.1)                | 338 (15.4)                      |         |
| 2                          | 917 (11.4)                  | 233 (10.6)                      |         |
| 3                          | 1,122 (14.0)                | 294 (13.4)                      |         |
| 4                          | 1,452 (18.1)                | 390 (17.8)                      |         |
| 5 (highest)                | 2,346 (29.2)                | 653 (29.8)                      |         |
| Disability                 |                             |                                 | < 0.01  |
| No                         | 6,717 (83.5)                | 1,711 (78.1)                    |         |
| Physical disability        | 1,297 (16.1)                | 462 (21.1)                      |         |
| Internal disability        | 26 (0.3)                    | 19 (0.9)                        |         |
| Lesion site of TB          |                             |                                 | 0.035   |
| Pulmonary                  | 6,886 (85.6)                | 1,838 (83.9)                    |         |
| Extra-pulmonary            | 1,154 (14.4)                | 354 (16.1)                      |         |
| TB history                 |                             |                                 | 0.501   |
| New case                   | 7,397 (92.0)                | 2,007 (91.6)                    |         |
| Previously treated TB      | 643 (8.0)                   | 185 (8.4)                       |         |
| PPM hospital               | 5,985 (74.4)                | 1,676 (76.5)                    | 0.053   |
| AFB smear positivity       | 2,880 (35.8)                | 744 (33.9)                      | 0.265   |
| Culture positivity         | 3,933 (48.9)                | 1,004 (45.8)                    | 0.031   |
| Charlson Comorbidity Index |                             |                                 | < 0.01  |
| 0                          | 2,002 (24.9)                | 469 (21.4)                      |         |
| 1                          | 3,789 (47.1)                | 891 (40.7)                      |         |
| 2                          | 568 (7.1)                   | 201 (9.2)                       |         |
| ≥ 3                        | 1,681 (20.9)                | 631 (28.8)                      |         |
| Comorbidity                |                             |                                 |         |
| Transplantation            | 12 (0.2)                    | 15 (0.7)                        | < 0.01  |
| HIV                        | 1 (0.0)                     | 0 (0.0)                         | 0.602   |
| Cancer                     | 168 (2.1)                   | 54 (2.5)                        | 0.287   |

**Supplementary Table 2. Continued**

| Variable                          | Women                       |                                 | p value |
|-----------------------------------|-----------------------------|---------------------------------|---------|
|                                   | Metformin users (n = 8,040) | Metformin non-users (n = 2,192) |         |
| Notification year                 |                             |                                 | < 0.01  |
| 2011                              | 991 (12.3)                  | 351 (16.0)                      |         |
| 2012                              | 1,164 (14.5)                | 306 (14.0)                      |         |
| 2013                              | 1,086 (13.5)                | 253 (11.5)                      |         |
| 2014                              | 1,227 (15.3)                | 340 (15.5)                      |         |
| 2015                              | 1,164 (14.5)                | 315 (14.4)                      |         |
| 2016                              | 1,219 (15.2)                | 304 (13.9)                      |         |
| 2017                              | 1,189 (14.8)                | 323 (14.7)                      |         |
| Anti-diabetic treatment           |                             |                                 |         |
| Sulfonylurea                      | 4,339 (54.0)                | 1,318 (60.1)                    | < 0.01  |
| Insulin                           | 297 (3.7)                   | 207 (9.4)                       | < 0.01  |
| Other DM medication <sup>a)</sup> | 4,795 (59.6)                | 1,387 (63.3)                    | 0.002   |
| Follow-up duration (d)            | 212 (183–284)               | 213 (182–287)                   | 0.24    |
| Treatment outcome                 |                             |                                 | < 0.01  |
| Treatment success/failure         | 7,367 (91.6)                | 1,881 (85.8)                    |         |
| Death due to all causes           | 673 (8.4)                   | 311 (14.2)                      |         |
| Cause of death                    |                             |                                 | 0.96    |
| TB-related deaths                 | 129 (1.6)                   | 60 (2.7)                        |         |
| Non-TB-related deaths             | 544 (6.8)                   | 251 (11.5)                      |         |

Values are presented as number (%) or median (interquartile range).

AFB, acid-fast bacilli; DM, diabetes mellitus; HIV, human immunodeficiency virus; PPM, public-private mix; TB, tuberculosis.

<sup>a)</sup>Other DM medications include dipeptidyl peptidase-4 inhibitors, glinide, thiazolidinedione, glucagon-like peptide-1, alpha-glucosidase inhibitors, and sodium-glucose cotransporter-2 inhibitors.
